# Supplementary material for: Risk Factors for Bunyavirus-Associated Severe Fever with Thrombocytopenia Syndrome: A Community-Based Case-Control Study
Source: PLoS One. 2016 Nov 15;11(11):e0166611. doi: 10.1371/journal.pone.0166611 (PMC5112944; doi:10.1371/journal.pone.0166611)
Supplement: S1 Table — (XLSX) [file pone.0166611.s001.xlsx]

## Sheet: Database
status	time	attribute	ethnicity	age	sex	occupation	code	dog	cat	cow	sheep	pig	avian	a1	a2	a3	a4	a5	a6	a7	a8	a9	a10	a11	a12	a13	a14	a15	a16	a17	a18
0	2	2	1	77	2	1	1	0	0	0	0	0	0	0	0	0	0	0	1	0	0	0	1	0	0	0	0		0	0	1
0	2	2	1	75	2	1	1	0	0	0	0	0	0	0	1	1	1	1	1	0	1	1	0	0	1	1	0	0	0	1	1
0	2	2	1	70	2	1	1	0	0	0	0	0	0	0	1	1	1	1	1	0	1	1	0	0	0	0	0	0	0	1	1
0	2	2	1	75	2	1	1	0	0	0	0	0	1	0	1	1	1	1	1	0	1	0	0	0	0	0	0	0	0	1	0
1	1	1	1	73	2	1	1	1	1	0	0	0	1	0	1	1	1	1	1	0	1	1	1	1	0	0	0	0	0	1	1
0	2	2	1	56	2	0	2	1	0	0	0	0	1	0	1	1	1	1	1	0	0	1	1	0	0	0	0	0	0	0	0
0	2	2	1	53	2	0	2	1	1	0	1	0	1	0	1	1	1	0	1	0	1	1	0	1	0	0	0	0	0	1	1
0	2	2	1	59	2	0	2	0	1	0	0	0	1	0	1	1	1	0	1	0	1	1	0	0	0	0	1	0	0	1	1
0	2	2	1	52	2	0	2	0	0	0	0	0	1	0	1	0	1	1	1	0	1	1	1	1	0	0	1	0	1	1	0
1	1	1	1	56	2	0	2	0	0	0	0	0	1	0	1	1	1	0	1	0	1	1	1	1	0	0	0	0	1	1	0
0	2	2	1	59	1	1	3	0	0	0	0	0	0	0	1	0	0	0	0	0	0	0	1	0	0	0	0		0	0	0
0	2	2	1	56	1	1	3	0	0	0	0	0	1	0	1	1	1	0	1	0	0	1	0	0	0	0	0	0	0	1	1
0	2	2	1	56	1	1	3	0	0	0	0	0	0	0	1	0	1	0	1	0	0	1	1	0	0	0	0	0	0	1	0
0	2	2	1	58	1	1	3	1	0	0	0	0	1	0	0	1	1	0	1	0	0	1	0	0	0	0	0	0	0	1	0
1	1	1	1	55	1	1	3	1	0	0	0	0	1	0	1	1	0	0	0	0	0	0	1	0	0	0	0		0	0	1
0	2	2	1	64	2	1	4	0	0	0	0	0	1	0	1	1	1	0	1	0	1	1	0	1	0	0	0	0	0	1	1
0	2	2	1	65	2	1	4	0	0	0	0	0	1	0	1	1	1	0	1	0	1	1	0	0	0	0	0	0	0	1	1
0	2	2	1	63	2	1	4	1	0	0	0	0	1	0	1	1	1	1	1	0	1	1	0	0	0	0	0	0	0	1	0
0	2	2	1	58	2	1	4	1	0	0	0	0	1	0	0	1	0	1	0	0	0	0	0	0	0	0	0		0	0	1
1	1	1	1	61	2	1	4	1	0	0	0	0	1	0	1	1	1	0	1	0	1	1	0	0	0	0	0	0	0	1	0
0	2	2	1	50	2	1	5	1	0	0	0	0	1	0	1	1	1	1	1	0	1	1	0	1	0	0	0	1	1	1	0
0	2	2	1	51	2	1	5	0	0	0	0	0	1	0	1	1	0	0	1	0	0	1	1	1	0	0	0	0	0	1	1
0	2	2	1	50	2	1	5	1	0	0	0	1	1	0	1	1	1	1	1	0	1	1	1	1	1	1	0	0	0	1	0
0	2	2	1	48	2	1	5	1	0	0	0	1	1	0	1	1	0	1	1	0	1	1	1	1	1	0	0	0	0	1	0
1	1	1	1	48	2	1	5	1	0	0	0	0	0	0	1	1	1	0	1	0	1	1	0	1	0	1	0	0	0	1	0
0	2	2	1	59	1	1	6	0	0	0	0	0	0	0	1	1	1	1	1	0	0	1	0	0	0	0	0	0	0	1	0
0	2	2	1	63	1	1	6	0	0	0	0	0	0	0	1	1	1	0	1	0	1	1	0	1	0	0	0	0	0	1	1
0	2	2	1	59	1	1	6	1	1	0	0	0	1	0	1	0	1	0	1	0	1	1	0	0	0	0	0	0	0	1	0
0	2	2	1	61	1	1	6	1	0	0	1	0	1	1	1	1	1	0	1	0	1	1	0	1	1	0	0	1	0	1	1
1	1	1	1	62	1	1	6	0	0	0	0	0	0	0	1	0	1	0	1	0	1	1	1	1	0	0	0	0	1	1	0
0	2	2	1	76	1	1	7	1	0	0	0	1	1	0	1	0	0	0	0	0	0	0	0	0	0	0	0		0	0	1
0	2	2	1	81	1	1	7	1	0	0	0	1	1	0	1	0	0	0	0	0	0	0	0	0	0	0	0		0	0	1
0	2	2	1	75	1	1	7	1	0	0	0	1	1	0	1	0	0	0	0	0	0	0	0	0	0	0	0		0	0	1
0	2	2	1	78	1	1	7	1	0	0	0	1	1	0	1	1	0	0	0	0	0	0	0	0	0	0	0		0	0	0
1	1	1	1	78	1	1	7	1	0	0	0	1	1	0	1	1	1	0	1	0	0	1	0	0	0	0	0	0	0	1	1
0	2	2	1	62	1	1	8	1	0	0	0	0	1	0	1	1	1	0	1	0	0	1	0	0	0	0	0	0	0	1	1
0	2	2	1	58	1	1	8	0	0	0	0	0	1	0	1	1	1	0	1	0	1	1	1	1	0	0	0	0	0	1	0
0	2	2	1	62	1	1	8	0	0	0	0	0	1	0	1	1	1	0	1	0	1	1	1	1	0	0	0	0	0	1	1
0	2	2	1	62	1	1	8	1	0	0	0	0	0	0	0	1	1	0	1	0	0	1	0	0	0	0	0	0	0	1	0
1	1	1	1	61	1	0	8	1	0	0	0	1	1	0	1	1	1	0	0	0	1	1	1	0	0	0	1	0	0	1	0
0	2	2	1	78	2	1	9	0	1	0	0	0	1	0	1	1	0	0	0	0	0	0	1	0	0	0	1		0	0	0
0	2	2	1	64	2	0	9	1	0	0	0	0	0	0	1	1	0	0	0	0	0	1	1	0	0	0	1	0	0	0	1
0	2	2	1	81	2	1	9	0	0	0	0	0	1	0	1	1	0	0	0	0	0	0	1	1	0	0	0	0	0	0	1
0	2	2	1	65	2	1	9	0	1	1	0	0	0	0	1	1	1	0	1	0	0	1	1	1	0	0	0	0	1	1	0
0	2	2	1	80	1	1	10	0	1	0	0	0	1	0	1	1	0	0	0	0	0	1	1	0	0	0	1	0	0	0	1
0	2	2	1	73	1	1	10	1	1	0	0	0	1	0	1	1	0	0	1	0	0	1	1	1	0	0	1	0	0	1	0
0	2	2	1	76	1	1	10	0	0	1	0	0	0	0	1	1	1	0	1	0	0	1	1	1	0	0	1	0	0	1	0
0	2	2	1	68	1	1	10	0	1	1	0	0	0	0	1	1	1	0	1	0	0	1	1	1	0	1	0	0	1	1	0
1	1	1	1	76	1	1	10	0	0	0	0	0	1	0	1	1	0	0	1	0	0	1	1	0	0	0	1	0	0	1	0
0	2	2	1	76	2	1	11	0	0	0	0	0	1	0	1	0	0	0	0	0	0	0	1	0	0	0	1		0	0	0
0	2	2	1	69	2	1	11	1	1	0	1	0	1	0	1	1	0	0	0	0	0	0	1	1	0	0	0	0	0	0	1
0	2	2	1	59	2	1	11	0	0	0	0	0	1	0	1	1	1	0	1	0	0	1	1	1	0	1	1	0	0	0	1
0	2	2	1	58	2	1	11	1	1	0	1	0	1	0	1	1	1	0	1	0	0	1	1	1	0	1	1	0	0	1	0
1	1	1	1	69	2	1	11	1	1	1	0	0	1	0	1	1	1	0	1	0	0	1	1	1	0	1	1	0	0	1	1
0	2	2	1	67	1	1	12	1	0	0	0	0	0	0	1	1	0	0	1	0	0	1	1	0	0	0	1	0	0	1	1
0	2	2	1	66	1	1	12	1	1	0	1	0	1	0	1	1	1	0	1	0	0	1	1	1	1	1	0	0	1	1	0
0	2	2	1	60	1	1	12	1	1	0	0	0	1	0	1	1	1	0	1	0	0	1	1	1	0	0	0	0	1	1	0
0	2	2	1	73	1	1	12	0	0	0	0	0	0	0	1	1	1	0	1	0	0	0	1	1	0	0	0	0	1	1	0
1	1	1	1	69	1	1	12	1	0	1	0	1	1	0	1	1	1	0	1	0	0	1	1	1	0	1	0	0	1	1	0
0	2	2	1	45	2	0	13	1	0	0	0	0	1	0	1	1	0	1	0	0	0	0	1	1	1	1	0		0	0	0
0	2	2	1	53	2	1	13	1	0	0	0	0	0	0	1	1	0	0	1	0	0	1	1	0	0	0	0	0	0	1	0
0	2	2	1	58	2	0	13	1	0	0	0	0	1	0	1	1	0	0	0	0	0	1	1	0	0	0	1	1	0	0	0
0	2	2	1	48	2	0	13	1	0	0	0	0	1	0	1	1	0	1	0	0	0	1	1	1	1	1	0	1	1	1	0
1	1	1	1	45	2	1	13	1	0	1	0	0	1	0	1	1	1	1	1	0	0	1	1	1	1	0	1	0	1	1	0
0	2	2	1	58	2	1	14	1	1	0	0	0	1	0	1	1	1	0	1	0	0	1	1	1	1	0	1	0	0	1	0
0	2	2	1	63	2	1	14	1	1	0	0	0	0	0	1	1	1	0	1	0	0	1	1	0	0	0	1	0	0	1	0
0	2	2	1	58	2	1	14	0	0	0	0	0	1	0	1	1	1	1	1	0	0	1	1	0	0	0	1	0	0	1	0
0	2	2	1	60	2	1	14	1	0	0	0	0	1	0	0	1	0	0	1	0	0	1	1	0	0	0	0	0	1	1	0
1	1	1	1	61	2	1	14	0	0	0	0	0	1	0	1	1	1	0	1	0	0	1	1	0	0	0	1	0	1	1	1
0	2	2	1	70	2	1	15	0	0	0	0	0	1	0	1	1	0	0	0	0	0	0	1	0	0	0	0		0	0	0
0	2	2	1	67	2	0	15	1	0	0	0	0	1	0	1	1	0	0	0	0	0	0	1	0	0	0	0		0	0	1
0	2	2	1	70	2	1	15	1	0	0	0	0	1	0	1	1	0	1	0	0	0	1	1	0	0	0	0	0	0	0	1
0	2	2	1	67	2	1	15	0	0	0	0	0	0	0	1	1	1	1	1	0	0	1	1	1	0	0	0	0	1	0	0
1	1	1	1	69	2	0	15	1	1	0	0	0	1	0	1	0	0	0	0	0	0	0	1	1	0	1	1		0	0	0
0	2	2	1	49	1	1	16	0	1	0	0	0	1	0	1	1	1	0	1	0	0	1	1	1	0	1	1	0	0	1	1
0	2	2	1	53	1	1	16	0	1	0	0	0	0	0	1	1	0	0	0	0	0	1	1	0	0	0	1	0	0	0	0
0	2	2	1	56	1	1	16	1	1	0	0	1	1	0	1	1	1	0	1	0	0	1	1	1	1	1	1	0	0	1	0
0	2	2	1	52	1	1	16	1	0	0	0	0	0	0	1	1	1	1	1	0	0	1	1	1	1	0	1	0	0	1	1
1	1	1	1	52	1	1	16	0	0	0	0	0	0	0	1	1	1	0	1	0	0	1	1	1	0	1	1	0	0	1	0
0	2	2	1	46	1	1	17	0	0	0	0	0	0	0	1	1	1	0	1	0	0	1	1	1	0	0	0	0	1	1	1
0	2	2	1	50	1	1	17	0	0	0	0	0	0	0	1	1	1	0	0	0	0	1	1	0	0	0	0	0	1	1	0
0	2	2	1	53	1	1	17	0	0	0	0	0	1	0	1	1	1	0	1	0	0	1	1	1	0	0	0	0	1	1	0
0	2	2	1	39	1	1	17	0	1	0	0	0	1	0	0	1	1	1	1	0	0	1	1	1	0	1	0	0	1	1	1
1	1	1	1	45	1	1	17	1	0	1	0	0	1	0	1	1	1	0	1	0	0	1	1	1	0	1	0	0	1	1	0
0	2	2	1	79	2	0	18	0	0	0	0	0	0	0	0	1	0	0	0	0	0	1	1	0	0	0	1	0	0	0	1
0	2	2	1	70	2	0	18	0	0	0	0	0	0	0	0	0	0	0	0	0	0	1	1	0	0	0	1	0	0	0	0
0	2	2	1	74	2	0	18	0	0	0	0	0	0	0	0	0	0	0	0	0	0	1	1	0	0	0	0	0	0	0	1
0	2	2	1	70	2	0	18	0	0	0	0	0	0	0	0	0	0	0	0	0	0	1	1	0	0	0	1	0	0	0	1
0	2	2	1	56	2	0	19	0	0	0	0	0	1	0	1	0	0	0	0	0	0	0	1	0	0	0	1		0	0	0
0	2	2	1	58	2	0	19	0	0	0	0	0	0	0	1	1	0	0	0	0	0	0	0	0	0	0	1	0	0	0	0
0	2	2	1	55	2	1	19	0	0	0	0	0	0	0	1	1	0	0	0	0	0	0	1	0	0	0	1	0	0	0	0
0	2	2	1	53	2	0	19	0	0	0	0	0	0	0	1	1	0	0	1	0	0	1	1	0	0	0	1	0	1	0	1
1	1	1	1	57	2	0	19	0	0	0	0	0	0	0	1	1	1	0	1	0	0	1	1	0	0	0	1	0	0	0	1
0	2	2	1	59	1	1	20	1	1	0	0	0	1	0	1	1	0	0	0	0	0	1	1	1	1	0	1	0	0	1	1
0	2	2	1	56	1	1	20	1	0	0	0	0	1	0	1	1	1	0	1	0	0	1	1	0	0	0	1	0	0	1	0
0	2	2	1	55	1	1	20	1	1	0	0	0	1	0	1	1	1	0	1	0	0	1	1	0	0	0	1	0	0	1	0
0	2	2	1	55	1	1	20	1	1	0	0	0	1	0	1	1	1	0	1	0	0	1	1	0	0	0	1	0	0	1	0
1	1	1	1	56	1	1	20	1	1	0	1	0	1	0	1	1	0	1	0	0	0	1	1	1	0	1	1	0	0	0	0
0	2	2	1	83	2	1	21	0	1	0	0	0	1	1	1	1	0	0	0	0	0	1	1	0	0	0	1	0	0	0	1
0	2	2	1	85	2	1	21	0	0	0	0	0	1	0	1	1	0	0	0	0	0	1	1	1	0	0	1	0	0	0	0
0	2	2	1	74	2	1	21	1	1	0	0	1	1	0	1	1	1	0	1	0	0	1	1	1	0	0	1	0	1	1	0
0	2	2	1	77	2	1	21	1	1	1	0	0	1	0	1	1	1	0	1	0	0	1	1	0	0	0	1	1	1	1	0
1	1	1	1	81	2	1	21	0	0	0	0	0	0	0	1	1	0	0	0	0	0	1	1	1	0	1	1	0	0	0	0
0	2	2	1	42	1	0	22	1	1	0	0	0	1	0	1	1	0	0	0	0	0	0	1	0	0	0	1		0	0	0
0	2	2	1	40	1	0	22	1	1	0	0	0	1	0	1	1	0	0	0	0	0	0	1	0	0	0	0		0	0	0
0	2	2	1	41	1	0	22	1	0	0	0	1	1	0	1	1	0	0	0	0	0	0	1	1	0	0	1		0	0	0
0	2	2	1	42	1	0	22	1	1	0	0	0	1	0	1	1	1	0	1	0	0	1	1	0	0	0	1	0	0	1	0
0	2	2	1	74	1	1	23	0	0	0	0	0	1	0	1	1	0	0	0	0	0	0	1	0	0	0	0		0	0	1
0	2	2	1	75	1	0	23	0	0	0	0	0	1	0	1	1	0	1	0	0	0	0	1	0	0	0	0		0	0	1
0	2	2	1	76	1	1	23	1	1	0	0	0	1	0	1	1	1	0	1	0	0	1	1	0	0	0	1	0	1	1	0
0	2	2	1	76	1	1	23	0	1	0	0	0	1	0	1	1	1	0	1	0	0	1	1	1	0	1	1	0	1	1	0
0	2	2	1	71	1	1	24	1	1	0	0	0	1	0	1	1	1	0	1	0	1	1	1	1	0	0	0	0	0	1	1
0	2	2	1	71	1	1	24	0	0	0	0	0	1	0	1	1	1	0	1	0	0	1	1	0	0	0	0	0	0	1	1
0	2	2	1	72	1	1	24	0	0	0	0	0	1	0	1	1	1	0	1	0	0	1	1	0	0	0	0	0	1	1	0
0	2	2	1	68	1	1	24	0	1	0	0	0	1	0	1	1	1	0	1	0	0	1	1	0	0	0	0	0	1	1	0
1	1	1	1	68	1	1	24	1	1	0	0	0	1	0	1	1	1	0	1	0	0	1	1	1	0	0	0	0	1	1	1
0	2	2	1	71	2	1	25	0	1	0	0	0	0	0	1	1	0	0	0	0	0	0	0	0	0	0	0	0	0	0	1
0	2	2	1	67	2	1	25	1	1	0	0	1	1	0	1	0	0	0	0	0	0	0	1	0	0	0	1	0	0	0	0
0	2	2	1	65	2	1	25	1	0	0	0	1	1	0	1	1	0	0	0	0	0	1	0	0	0	0	1	0	0	1	1
0	2	2	1	62	2	1	25	1	0	0	0	0	1	0	1	1	0	0	1	0	0	1	0	0	0	0	0	0	0	0	1
1	1	1	1	65	2	1	25	1	1	1	0	1	1	0	1	1	0	0	1	0	1	1	1	0	0	0	0	0	1	1	1
0	2	2	1	60	1	1	26	0	0	0	0	0	1	0	1	1	0	0	0	0	0	0	0	0	0	0	0	0	0	0	1
0	2	2	1	72	1	1	26	0	0	0	0	0	1	0	1	1	0	0	0	0	0	1	0	0	0	0	0	0	0	0	1
0	2	2	1	70	1	1	26	1	0	0	0	1	1	0	1	1	1	0	1	0	0	1	1	0	0	1	1	0	0	1	0
0	2	2	1	69	1	1	26	0	0	0	0	0	1	0	1	1	1	0	1	0	0	1	1	1	1	0	1	0	0	1	1
1	1	1	1	67	1	1	26	1	1	0	0	0	1	0	1	1	1	1	1	0	0	1	1	1	0	1	1	0	0	0	1
0	2	2	1	75	2	1	27	0	0	0	0	0	1	0	1	1	0	0	0	0	0	0	0	0	0	0	0		0	0	1
0	2	2	1	70	2	1	27	0	0	0	0	0	1	0	1	1	0	0	0	0	0	1	1	0	0	0	1	0	0	0	1
0	2	2	1	73	2	1	27	0	0	0	0	0	0	0	1	1	0	0	0	0	0	0	1	0	0	0	1	0	0	0	1
0	2	2	1	70	2	1	27	0	0	0	0	0	1	0	1	1	0	0	1	0	0	1	0	0	0	0	0	0	0	1	0
0	2	2	1	68	2	1	28	1	0	0	0	0	1	0	1	1	0	1	1	0	0	1	1	0	0	0	1	0	1	1	1
0	2	2	1	68	2	1	28	0	0	0	0	0	1	0	1	1	0	0	1	0	1	1	1	0	0	0	0	0	0	0	0
0	2	2	1	68	2	1	28	0	0	0	0	0	0	0	1	1	1	0	1	0	0	1	1	0	0	0	0	0	0	1	0
0	2	2	1	68	2	1	28	0	0	0	0	0	1	0	1	1	0	1	1	0	0	1	1	0	0	0	1	0	1	1	0
0	2	2	1	56	1	1	29	1	1	0	0	1	1	0	1	1	1	0	1	0	0	1	1	1	0	1	1	0	0	0	0
0	2	2	1	61	1	1	29	1	0	0	0	0	1	0	1	1	0	1	1	0	1	1	1	1	1	0	1	0	0	1	1
0	2	2	1	61	1	1	29	1	0	0	1	1	1	0	1	1	1	1	1	0	0	1	1	0	0	0	1	0	1	0	0
0	2	2	1	60	1	1	29	1	0	0	0	0	1	0	1	1	1	0	1	0	1	1	1	1	0	0	0	0	1	1	0
1	1	1	1	58	1	1	29	1	1	1	0	0	1	0	1	1	1	0	1	0	0	1	1	1	1	1	1	0	0	1	0
0	2	2	1	80	1	0	30	0	0	0	0	0	0	0	0	1	0	1	0	0	0	0	0	0	0	0	0		0	0	0
0	2	2	1	53	2	0	30	0	0	0	0	0	0	0	0	0	0	0	0	0	0	0	0	0	0	0	0		0	0	0
0	2	2	1	78	1	1	30	0	0	0	0	0	0	0	1	1	0	1	0	0	0	0	1	0	0	0	0		0	0	1
0	2	2	1	80	1	1	30	0	0	0	0	0	0	0	1	0	0	0	0	0	0	0	0	0	0	0	0		0	0	1
0	2	2	1	78	1	1	30	0	0	0	0	0	0	0	1	1	1	0	1	0	0	1	0	0	0	0	0	0	1	1	1
1	1	1	1	79	1	0	30	1	0	0	0	0	0	0	1	0	0	0	1	0	1	1	0	0	1	0	0	0	1	1	0
0	2	2	1	57	2	0	31	0	0	0	0	0	0	0	0	1	0	1	1	0	0	0	0	0	0	0	0		0	0	0
0	2	2	1	62	2	0	31	0	0	0	0	0	0	0	0	1	0	1	1	0	0	0	0	0	0	0	0	0	0	1	0
0	2	2	1	33	2	0	31	0	0	0	0	0	0	0	0	0	0	0	1	0	0	0	0	0	0	0	0		0	0	0
0	2	2	1	56	2	0	31	0	0	0	0	0	0	0	0	0	1	0	1	0	1	1	0	0	0	0	0	0	0	1	0
0	2	2	1	34	1	0	31	0	0	0	0	0	0	1	0	1	1	0	1	0	0	0	0	0	0	0	1	0	1	1	1
0	2	2	1	60	2	0	31	0	0	0	0	0	0	0	0	0	0	0	1	0	0	1	0	0	0	0	0	1	0	0	1
0	2	2	1	54	1	0	32	0	0	0	0	0	0	0	1	1	0	1	1	0	0	0	0	0	0	0	0	0	0	0	0
0	2	2	1	57	1	0	32	0	0	0	0	0	1	0	1	1	1	1	1	0	0	0	0	0	0	0	0	0	1	1	1
0	2	2	1	61	1	0	32	0	0	0	0	0	0	0	0	0	0	0	1	0	0	0	0	0	0	0	0	0	1	1	0
0	2	2	1	59	1	0	32	0	0	0	0	0	0	0	0	1	0	1	1	0	0	0	0	0	0	0	0	0	1	1	1
0	2	2	1	63	2	1	33	0	0	0	0	0	1	0	1	1	0	0	0	0	0	0	1	1	0	1	1		0	0	0
0	2	2	1	68	2	1	33	1	0	0	0	0	1	0	1	1	1	1	1	0	1	1	1	1	0	1	1	0	0	1	1
0	2	2	1	65	2	1	33	1	1	0	0	0	1	0	1	1	1	0	1	0	0	1	1	1	0	1	1	0	0	1	1
0	2	2	1	63	2	1	33	0	1	0	0	0	1	0	1	1	1	0	1	0	1	1	1	1	1	1	1	0	1	1	0
0	2	2	1	49	2	1	34	0	1	0	0	0	1	0	1	1	0	0	1	0	0	1	1	0	0	0	1	0	0	0	1
0	2	2	1	45	2	1	34	0	0	0	0	0	1	0	1	1	1	0	1	0	0	1	1	0	0	0	1	0	0	1	0
0	2	2	1	51	2	1	34	0	0	0	0	1	1	0	1	1	0	0	1	0	0	1	1	0	0	0	0	0	0	1	1
0	2	2	1	50	2	1	34	0	0	0	0	0	1	0	1	1	0	0	1	0	0	1	0	0	0	0	0	0	1	1	1
1	1	1	1	48	2	1	34	1	1	0	0	0	1	0	1	1	0	0	1	0	0	1	1	0	0	1	0	0	0	1	0
0	2	2	1	53	1	1	35	0	0	0	0	0	0	0	1	1	0	1	1	0	0	1	1	0	0	0	0	0	0	1	0
0	2	2	1	55	1	0	35	0	0	0	0	0	1	0	1	1	0	0	1	0	0	1	1	1	0	0	1	0	1	1	0
0	2	2	1	51	1	1	35	0	0	0	0	0	1	0	1	1	1	1	1	0	0	1	1	1	0	0	1	0	1	1	0
0	2	2	1	48	1	1	35	1	0	0	0	1	0	0	1	1	0	1	0	0	0	1	1	0	0	0	1	1	0	0	0
1	1	1	1	56	1	1	35	1	0	0	0	1	1	0	0	1	0	0	0	0	0	1	1	0	0	0	1	0	0	1	0
0	2	2	1	48	1	1	36	0	0	0	0	1	1	0	1	1	1	0	1	0	0	1	1	1	0	0	0	0	0	1	0
0	2	2	1	62	1	0	36	0	0	0	0	0	1	0	1	1	0	0	0	0	0	0	1	1	0	0	0		0	0	0
0	2	2	1	53	1	1	36	0	1	1	0	1	1	0	1	0	1	0	1	0	0	1	1	0	0	0	0	0	0	1	1
0	2	2	1	51	1	1	36	1	1	0	0	0	1	0	1	1	1	0	1	0	0	1	1	1	0	0	0	1	0	1	0
1	1	1	1	53	1	1	36	0	0	0	0	0	1	0	1	1	1	0	1	0	0	1	1	0	0	1	0	0	0	1	0
0	2	2	1	56	2	1	37	0	1	0	0	0	1	0	1	1	0	0	1	0	0	1	0	0	0	0	0	1	0	0	0
0	2	2	1	56	2	1	37	0	1	0	0	0	1	0	1	1	0	0	1	0	0	1	1	0	0	0	0	1	0	1	0
1	1	1	1	54	2	1	37	0	0	0	0	0	1	0	1	1	1	0	1	0	0	1	1	0	0	0	0	0	0	0	1
0	2	2	1	44	2	1	38	1	1	0	0	1	1	0	1	1	1	0	1	0	1	1	1	1	0	1	1	0	0	1	0
0	2	2	1	43	2	1	38	0	0	0	0	0	1	0	1	1	1	0	1	0	1	1	1	1	0	0	1	1	0	0	0
0	2	2	1	37	2	1	38	0	0	0	0	1	1	0	1	1	1	0	1	0	1	1	1	1	0	1	0	1	0	1	0
1	1	1	1	41	2	1	38	1	1	0	0	1	1	0	1	1	1	0	1	0	1	1	1	1	1	1	0	0	0	1	0
0	2	2	1	33	2	1	39	1	1	0	1	0	1	0	1	1	1	0	1	1	0	1	1	1	1	0	0	0	0	1	0
0	2	2	1	34	2	1	39	0	0	0	0	1	1	0	1	1	0	0	1	0	1	1	0	1	0	0	0	1	0	0	0
1	1	1	1	36	2	1	39	1	1	0	0	0	1	0	1	1	1	0	1	0	1	1	1	1	0	0	0	0	0	1	0
0	2	2	1	63	1	1	40	1	1	0	0	1	1	0	1	0	0	0	1	0	0	1	1	1	0	0	0	0	0	0	0
0	2	2	1	62	1	1	40	0	1	0	0	1	1	0	1	1	1	0	1	0	0	1	1	0	0	0	0	0	0	1	0
1	1	1	1	60	1	1	40	0	1	0	0	1	1	0	1	1	0	0	1	0	0	1	1	0	0	0	0	0	0	1	0
0	2	2	1	74	1	1	41	0	0	0	0	0	0	0	1	1	0	0	1	0	0	1	1	1	0	1	0	0	0	0	0
0	2	2	1	76	1	1	41	1	1	1	0	1	1	1	1	1	1	0	1	0	0	1	1	1	1	1	0	0	0	1	0
0	2	2	1	77	1	1	41	0	0	0	0	0	1	0	1	1	0	0	1	0	0	1	1	1	0	0	0	0	0	1	0
1	1	1	1	82	1	1	41	0	1	0	0	0	1	0	1	1	0	0	1	1	1	1	1	1	0	0	1	0	0	1	1
0	2	2	1	72	1	0	43	1	1	1	0	1	1	0	1	1	1	0	1	1	1	1	1	1	1	1	0	0	0	0	0
0	2	2	1	69	1	1	43	0	1	0	0	0	0	0	1	0	0	0	1	0	0	1	1	0	0	0	0	1	0	1	0
1	1	1	1	70	1	1	43	1	1	0	0	1	1	0	1	1	0	0	1	0	0	1	1	1	0	0	0	0	0	0	0
0	2	2	1	62	2	1	44	1	1	1	0	1	1	0	1	1	0	0	1	0	1	1	1	1	1	0	0	0	0	1	1
0	2	2	1	59	2	1	44	1	0	1	0	1	1	0	1	1	0	0	1	0	1	1	1	1	1	1	0	0	0	1	1
1	1	1	1	59	2	1	44	1	1	0	0	1	1	0	1	1	0	0	1	0	1	1	1	1	0	1	0	0	0	1	0
0	2	2	1	43	1	0	45	1	0	0	0	0	1	0	1	1	1	0	1	1	1	1	0	1	0	0	0	0	0	0	0
0	2	2	1	41	1	1	45	1	1	0	0	1	1	0	1	1	1	0	1	0	0	1	1	0	0	0	1	0	0	1	0
0	2	2	1	41	1	1	45	0	1	0	0	0	1	0	0	0	0	0	1	0	0	1	1	0	0	0	0	0	0	1	0
1	1	1	1	43	1	0	45	1	1	0	0	0	1	1	1	1	0	0	1	0	0	1	1	1	1	1	0	0	0	0	0
0	2	2	1	44	1	1	46	1	1	0	0	0	1	0	1	1	1	0	1	0	0	1	1	0	0	0	1	0	0	1	0
0	2	2	1	47	1	1	46	1	1	0	0	0	1	0	1	1	1	0	1	0	0	1	1	0	0	0	1	0	1	1	0
1	1	1	1	44	1	1	46	1	1	0	0	0	1	1	1	1	1	0	1	0	0	0	1	1	0	0	1	0	1	1	0
0	2	2	1	78	1	1	47	1	1	0	0	0	1	0	1	1	0	0	0	0	0	1	1	0	0	0	1	0	0	1	1
0	2	2	1	73	1	1	47	0	1	0	0	0	1	0	1	1	0	0	1	0	0	1	1	0	0	0	1	0	0	0	1
0	2	2	1	77	1	1	47	0	0	0	0	0	1	0	1	1	1	0	1	0	0	1	1	0	0	0	1	0	0	0	1
1	1	1	1	77	1	1	47	1	1	0	0	0	1	1	1	1	1	0	1	0	0	1	1	1	0	0	1	0	1	1	0
0	2	2	1	76	1	1	48	1	1	0	0	0	1	0	1	1	0	0	0	0	0	0	1	1	0	0	0	0	0	0	1
0	2	2	1	70	1	1	48	1	1	0	0	1	0	0	1	1	0	0	1	0	0	1	1	1	0	1	1	0	0	1	0
0	2	2	1	70	1	1	48	0	0	0	0	0	1	0	0	0	0	0	0	0	0	0	1	1	1	1	1	0	0	0	0
1	1	1	1	73	1	1	48	1	0	0	0	0	1	1	1	1	1	0	1	0	0	1	1	1	0	1	0	0	0	1	1
0	2	2	1	45	2	1	49	1	1	0	1	0	1	0	1	1	1	0	1	0	0	1	0	1	1	0	0	0	0	1	0
0	2	2	1	44	2	1	49	1	1	1	0	1	1	0	1	1	1	0	1	0	1	1	1	1	0	0	0	0	0	1	0
0	2	2	1	40	2	1	49	1	1	0	0	0	1	1	1	1	1	0	1	0	1	1	1	1	0	1	0	0	0	1	0
1	1	1	1	45	2	1	49	1	0	0	0	0	1	0	1	1	0	0	1	0	1	1	0	1	1	1	0	0	0	1	0
0	2	2	1	45	1	1	50	0	0	0	0	0	0	0	1	1	1	0	1	0	0	1	1	0	0	0	0	0	0	1	1
0	2	2	1	42	1	1	50	0	0	0	0	0	1	0	1	1	1	0	1	0	0	1	1	0	0	0	0	0	0	1	0
0	2	2	1	41	1	1	50	1	0	0	0	1	0	0	1	1	1	0	1	0	0	1	0	0	0	0	0	0	0	1	0
1	1	1	1	44	1	1	50	0	0	0	0	0	1	0	1	1	1	0	1	0	0	1	0	0	0	0	1	0	0	1	0
0	2	2	1	59	1	1	51	1	1	0	0	0	1	0	1	1	1	0	1	0	0	1	1	1	0	1	0	0	0	1	0
0	2	2	1	64	1	1	51	1	1	0	0	0	1	0	1	1	1	0	1	0	0	1	1	1	1	0	0	0	0	1	1
0	2	2	1	64	1	1	51	1	1	1	0	0	1	0	1	1	1	1	1	0	0	1	1	1	1	0	0	0	0	1	0
1	1	1	1	61	1	1	51	1	1	0	0	0	1	0	1	1	1	0	1	0	0	1	1	1	1	1	0	0	0	1	0
0	2	2	1	47	1	1	52	0	0	0	0	0	1	0	1	1	1	0	1	0	0	1	0	1	1	0	0	0	0	1	0
0	2	2	1	47	1	1	52	1	0	0	0	0	1	0	1	1	1	0	1	0	0	1	0	1	0	0	0	0	0	1	0
0	2	2	1	41	1	1	52	1	0	0	1	1	1	0	1	1	1	0	1	0	0	1	1	1	1	0	0	1	0	1	0
1	1	1	1	43	1	1	52	1	1	1	0	0	1	0	1	1	1	0	1	0	0	1	0	1	1	1	0	0	0	1	0
0	2	2	1	70	2	1	53	1	0	0	0	0	1	0	1	1	0	0	0	0	0	0	0	0	0	0	0	0	0	0	1
0	2	2	1	65	2	1	53	0	0	0	0	0	1	0	0	1	1	0	1	0	0	1	0	1	1	0	0	0	0	1	0
0	2	2	1	70	2	1	53	0	1	0	0	0	1	0	0	0	0	0	0	0	0	0	0	0	0	0	0	0	0	0	1
1	1	1	1	65	2	1	53	0	0	0	0	0	1	0	1	1	1	0	1	0	0	1	0	1	1	1	0	0	0	1	0
0	2	2	1	65	2	1	54	1	0	0	0	0	1	1	1	0	0	0	0	0	0	1	1	1	0	0	0	0	0	1	1
0	2	2	1	70	2	1	54	1	0	0	0	0	1	0	1	1	0	1	0	0	0	1	1	1	1	0	0	0	0	1	0
0	2	2	1	67	2	1	54	1	1	0	0	0	1	1	0	0	0	0	1	0	1	1	1	1	0	0	0	0	0	1	0
1	1	1	1	68	2	1	54	1	0	0	0	0	1	0	1	1	0	0	1	0	0	1	1	1	0	0	0	0	0	1	1
0	2	2	1	56	1	1	55	1	1	1	0	1	1	0	1	0	0	0	1	0	0	1	1	1	1	0	0	0	0	0	0
0	2	2	1	52	1	1	55	1	0	1	0	1	1	0	1	1	1	0	1	0	0	1	1	1	0	0	0	0	0	1	1
0	2	2	1	57	1	1	55	1	0	0	0	1	1	0	1	1	1	0	1	0	0	1	1	0	0	0	0	1	0	1	0
1	1	1	1	55	1	1	55	1	0	1	0	0	0	0	1	0	1	0	1	0	0	1	1	1	0	1	0	0	0	1	0
0	2	2	1	59	1	1	56	1	1	1	0	1	1	0	1	1	1	0	1	0	0	1	1	1	0	0	0	0	0	1	0
0	2	2	1	58	1	1	56	1	0	0	0	1	1	0	1	1	1	0	1	0	0	1	1	1	0	0	0	0	0	1	0
0	2	2	1	65	1	1	56	1	1	0	0	1	1	0	1	1	1	0	1	0	0	1	0	1	0	0	0	0	0	1	1
0	2	2	1	67	1	1	56	0	0	0	0	0	0	0	0	1	0	0	0	0	0	0	0	1	0	0	0		0	0	0
1	1	1	1	62	1	1	56	1	0	0	0	0	1	0	1	1	1	0	1	0	0	1	1	1	0	0	0	0	0	1	1
0	2	2	1	55	2	1	57	1	1	0	1	1	1	1	1	1	0	0	0	0	0	1	0	1	0	0	0	0	0	1	1
0	2	2	1	66	2	1	57	1	1	0	0	1	1	0	1	1	1	0	1	0	0	1	1	1	0	0	0	0	0	1	1
0	2	2	1	61	2	1	57	0	0	0	0	0	0	0	0	1	0	0	0	0	0	0	0	1	0	0	0		0	0	1
0	2	2	1	65	2	1	57	0	0	0	0	0	0	0	0	1	0	0	0	0	0	0	0	1	0	0	0		0	0	1
1	1	1	1	60	2	1	57	1	0	0	0	0	1	0	1	1	0	0	0	0	0	1	1	1	0	0	0	0	0	1	1
0	2	2	1	72	1	1	58	1	1	0	0	1	1	0	1	1	0	0	0	0	0	1	1	1	0	0	0	0	0	0	1
0	2	2	1	72	1	1	58	1	1	0	0	0	1	0	1	1	0	0	0	0	0	1	1	1	0	0	0	0	0	0	1
0	2	2	1	71	1	1	58	1	1	0	0	1	1	0	1	1	1	0	1	0	0	1	1	1	0	0	0	0	0	1	0
1	1	1	1	71	1	1	58	1	1	0	1	1	1	0	1	1	1	1	1	0	0	1	1	1	0	0	0	0	0	1	0
0	2	2	1	74	1	1	59	1	1	0	0	0	1	0	1	1	1	0	1	0	0	1	1	1	0	0	0	0	0	1	0
0	2	2	1	74	1	1	59	1	1	0	0	0	1	0	1	1	0	0	0	0	0	0	1	1	0	0	0	0	1	1	0
0	2	2	1	73	1	1	59	1	1	0	0	0	1	0	1	1	0	0	0	0	0	0	1	1	0	0	0	0	1	1	1
1	1	1	1	76	1	1	59	1	1	0	0	0	1	0	1	1	0	0	1	0	0	1	1	1	0	0	0	0	0	0	1
0	2	2	1	37	1	1	60	1	1	0	0	0	1	0	1	1	0	0	0	0	0	1	1	1	0	0	0	0	1	1	0
0	2	2	1	36	1	1	60	1	1	0	0	1	1	0	1	1	1	0	1	0	0	1	1	1	0	0	0	0	1	1	0
0	2	2	1	37	1	1	60	1	1	0	0	1	1	0	1	1	1	0	1	0	0	1	1	1	0	0	0	0	1	1	1
1	1	1	1	38	1	1	60	1	1	0	0	0	1	1	1	1	0	0	0	0	0	1	1	1	0	0	0	0	0	0	1
0	2	2	1	62	2	1	61	1	1	0	0	0	1	0	1	1	1	0	1	0	0	1	1	1	1	0	0	0	0	0	0
0	2	2	1	63	2	1	61	1	1	0	0	0	1	0	1	1	1	0	1	0	0	1	1	0	0	0	0	0	0	1	0
0	2	2	1	64	2	1	61	1	1	1	0	0	1	0	1	0	1	0	1	0	0	1	1	0	0	0	1	0	0	1	0
0	2	2	1	64	2	1	61	1	0	0	0	0	1	0	1	0	1	0	1	0	0	1	1	0	0	0	1	0	0	1	1
1	1	1	1	64	2	1	61	1	1	1	0	0	1	0	1	0	1	0	1	0	0	1	1	0	0	0	1	0	0	1	0
0	2	2	1	38	1	1	62	1	1	0	0	0	1	0	1	1	0	0	1	0	1	1	1	0	0	0	1	0	0	0	1
0	2	2	1	58	1	1	62	1	0	0	0	0	1	0	1	1	0	0	1	0	1	0	0	0	0	0	0	0	0	1	1
0	2	2	1	47	1	1	62	0	0	0	0	0	1	0	0	1	0	0	1	0	0	0	0	0	0	0	0	0	0	0	0
1	1	1	1	49	1	1	62	1	0	0	0	0	1	0	1	1	1	0	1	0	1	0	0	0	0	1	0	0	0	0	0
0	2	2	1	72	2	1	63	0	1	0	0	0	1	0	1	1	0	0	0	0	0	1	1	0	0	0	1	0	0	0	1
0	2	2	1	71	2	1	63	1	0	0	0	0	1	0	1	1	1	0	1	0	0	1	1	0	0	0	1	0	0	1	1
0	2	2	1	66	2	1	63	0	1	0	0	0	1	0	1	1	1	0	1	0	0	1	1	0	0	0	1	0	0	1	1
1	1	1	1	69	2	1	63	1	1	0	0	0	1	0	1	1	1	0	1	0	0	1	1	1	1	0	1	0	0	1	0
0	2	2	1	65	1	1	64	1	1	0	0	0	1	0	1	1	0	0	1	0	0	1	1	1	0	0	1	0	0	1	0
0	2	2	1	61	1	1	64	1	0	0	0	0	1	0	1	1	0	0	1	0	0	1	1	1	0	0	0	1	0	1	0
0	2	2	1	68	1	1	64	1	1	0	0	0	1	0	1	1	0	0	1	0	0	1	1	1	0	0	0	1	0	1	0
1	1	1	1	63	1	1	64	0	0	0	0	0	0	0	1	1	0	0	1	0	0	1	1	1	0	1	1	0	0	1	0
0	2	2	1	60	1	0	65	0	0	0	0	0	1	0	1	0	0	0	0	0	0	1	1	1	0	0	0	0	0	1	0
0	2	2	1	50	1	0	65	0	0	0	0	0	0	0	1	0	0	0	1	0	0	1	1	1	0	0	1	0	0	1	0
0	2	2	1	53	1	0	65	0	0	0	0	0	0	0	1	1	0	1	1	0	0	1	1	1	0	0	0	1	1	1	0
1	1	1	1	52	1	0	65	0	1	0	0	0	0	0	1	0	0	0	1	0	0	1	1	1	0	0	1	0	0	1	0
0	2	2	1	69	2	1	66	1	1	1	0	0	1	0	1	1	0	0	1	0	0	1	1	1	0	0	1	0	0	0	0
0	2	2	1	68	2	1	66	0	1	0	0	0	1	0	1	1	0	0	1	0	0	1	1	1	0	0	1	0	0	1	0
0	2	2	1	70	2	1	66	1	1	1	0	0	1	0	1	1	0	0	1	0	0	1	1	1	0	0	0	1	0	1	0
1	1	1	1	69	2	1	66	1	1	1	0	0	1	0	1	1	0	0	1	0	0	1	1	1	1	1	0	0	0	1	1
0	2	2	1	66	2	1	67	1	1	0	0	0	0	0	1	1	1	1	1	0	1	1	1	1	1	0	1	0	1	1	0
0	2	2	1	63	2	1	67	1	1	0	0	1	1	0	1	0	0	0	1	0	0	1	0	1	0	0	0	1	0	1	0
0	2	2	1	65	2	1	67	0	0	0	0	0	1	0	1	1	0	0	1	0	0	1	0	1	0	0	0	1	0	1	0
1	1	1	1	66	2	1	67	0	0	0	0	0	0	0	1	1	1	0	1	0	0	1	1	1	1	1	1	0	0	1	0
0	2	2	1	46	2	1	68	1	1	1	1	0	1	0	1	1	1	0	1	0	1	1	1	1	1	1	1	0	0	1	0
0	2	2	1	41	2	1	68	1	1	1	1	0	1	0	1	1	1	0	1	0	1	1	1	1	0	0	1	0	0	1	0
0	2	2	1	45	2	1	68	1	0	0	0	0	1	0	1	0	1	0	1	0	1	1	1	1	0	0	1	0	0	1	0
1	1	1	1	47	2	1	68	1	1	1	0	0	1	0	1	1	1	0	1	0	1	1	1	1	0	0	1	0	0	1	0
0	2	2	1	43	1	0	69	0	0	0	0	0	0	0	1	1	0	0	0	0	0	1	1	1	0	0	1	0	0	0	0
0	2	2	1	43	1	0	69	0	0	0	0	0	0	0	1	1	1	0	1	0	0	1	1	1	1	0	1	0	0	1	0
0	2	2	1	45	1	0	69	0	1	0	0	0	1	0	1	1	1	0	1	0	1	1	1	1	1	0	1	0	0	1	0
0	2	2	1	44	1	0	69	0	0	0	0	0	0	0	1	1	1	0	1	0	1	1	1	1	1	0	1	0	0	1	0
1	1	1	1	42	1	0	69	0	0	0	0	0	1	0	1	1	1	0	1	1	0	1	1	1	1	1	1	0	1	1	0
0	2	2	1	64	1	1	70	1	0	0	0	1	1	0	1	1	1	0	1	0	1	1	1	1	0	0	1	0	0	1	0
0	2	2	1	60	1	1	70	1	1	0	0	0	1	0	1	1	1	0	1	0	1	1	1	1	1	1	1	0	0	1	0
1	1	1	1	63	1	1	70	0	0	0	0	0	1	0	1	1	0	0	1	0	0	1	1	1	0	0	1	0	0	1	1
0	2	2	1	69	2	1	71	1	0	1	0	0	1	0	1	1	1	0	1	0	1	1	0	1	0	0	1	0	0	1	0
0	2	2	1	71	2	1	71	0	0	0	0	0	1	0	1	0	1	0	1	0	1	1	0	1	1	1	1	0	0	1	1
1	1	1	1	66	2	1	71	0	0	0	0	0	0	0	0	1	0	0	0	0	1	1	1	1	0	1	0	0	0	1	0
0	2	2	1	60	2	1	72	1	1	0	0	1	1	0	1	1	1	0	1	0	0	1	1	1	0	0	0	0	1	1	1
0	2	2	1	60	2	1	72	1	1	0	0	1	1	0	1	1	1	0	1	0	0	1	1	1	0	0	0	0	1	1	1
0	2	2	1	62	2	1	72	1	1	0	0	1	1	0	1	1	1	0	1	0	0	1	1	1	0	0	0	0	1	1	0
1	1	1	1	61	2	1	72	1	1	0	0	1	1	0	1	1	0	0	1	0	0	0	0	1	0	0	0		0	0
0	2	2	1	41	2	1	73	0	0	0	0	0	0	0	1	1	1	0	1	0	1	1	1	1	0	0	0	0	0	1	0
0	2	2	1	45	2	1	73	1	1	0	0	0	1	0	1	1	1	0	1	0	1	1	1	1	0	0	0	0	0	1	0
1	1	1	1	48	2	1	73	1	0	0	0	1	1	0	1	1	0	0	1	0	0	1	1	0	0	1	0	0	0	1	0
0	2	2	1	56	2	1	74	1	1	0	0	1	1	0	1	1	1	0	1	1	1	1	1	1	0	0	0	1	0	1	0
0	2	2	1	50	2	1	74	0	0	0	0	1	1	0	1	1	1	0	1	1	1	1	1	1	0	0	0	1	0	1	1
1	1	1	1	59	2	1	74	1	1	0	1	1	1	0	1	1	0	0	1	0	1	1	1	1	0	0	0	0	0	1	1
0	2	2	1	65	1	1	75	0	1	0	0	1	1	0	1	0	1	0	1	0	0	1	1	0	0	0	0	0	0	0	1
0	2	2	1	73	1	1	75	0	0	0	0	1	1	0	1	1	1	1	1	0	1	1	1	1	1	0	0	0	0	1	1
0	2	2	1	63	1	1	75	0	1	0	0	1	1	0	1	1	1	1	1	0	0	1	1	1	0	0	0	0	0	1	0
1	1	1	1	65	1	0	75	1	0	0	0	0	1	0	1	1	1	1	1	0	1	1	1	0	0	0	1	1	0	1	0
0	2	2	1	69	2	1	76	0	1	0	0	0	1	0	1	1	1	0	1	0	1	1	1	1	0	0	0	0	0	1	1
0	2	2	1	64	2	1	76	1	0	0	0	0	0	0	1	1	1	0	1	0	1	1	0	0	0	0	0	0	0	1	1
1	1	1	1	78	2	1	76	0	1	0	0	0	1	1	1	1	1	0	1	0	1	1	1	1	0	0	0	0	0	0	0
0	2	2	1	55	1	1	77	0	0	0	0	0	0	0	1	1	0	0	1	0	1	1	1	1	0	1	1	0	0	1	0
0	2	2	1	48	1	1	77	1	1	0	0	1	1	0	1	1	1	0	1	0	1	1	1	1	0	0	0	0	1	1	0
0	2	2	1	48	1	1	77	0	1	0	0	1	1	0	1	1	1	0	1	1	1	1	1	1	0	0	0	0	1	1	0
1	1	1	1	49	1	1	77	1	1	0	0	1	1	0	1	1	0	0	1	1	1	1	1	1	0	1	0	0	0	1	0
0	2	2	1	53	1	1	78	1	0	0	0	0	1	0	1	1	1	0	1	1	0	1	1	1	0	0	0	0	0	1	0
0	2	2	1	50	1	1	78	1	0	0	0	1	1	0	1	1	0	0	1	0	0	1	1	0	0	0	0	0	0	1	1
1	1	1	1	51	1	1	78	0	0	0	0	0	0	0	1	1	0	0	0	0	1	1	1	0	0	0	0	0	0	1	0
0	2	2	1	51	2	0	79	1	1	0	0	1	1	0	1	1	0	0	0	0	0	0	1	0	0	0	0		0	0	1
0	2	2	1	63	2	1	79	1	0	1	0	0	1	0	1	1	1	1	1	0	0	1	1	1	0	0	0	0	0	0	0
0	2	2	1	47	2	1	79	1	0	0	0	1	1	0	1	1	0	0	1	0	0	1	1	0	0	0	0	1	0	0	0
1	1	1	1	47	2	1	79	1	0	0	1	1	1	0	1	1	1	0	1	0	0	1	1	1	0	1	0	0	0	0	0

## Sheet: Label
variable	label
status	Dummy variable for analysis
time	Dummy variable for analysis
attribute	Classification	1=Case	2=Control
ethnicity		1=Han Chinese	2=Others
sex		1=Male	2=Female
code	Group Number
dog	Raising dogs	1=Yes	2=No
cat	Raising cats	1=Yes	2=No
cow	Raising cattle	1=Yes	2=No
sheep	Raising goats	1=Yes	2=No
pig	Raising pigs	1=Yes	2=No
avian	Raising poultry	1=Yes	2=No
a1	Domestic animals illness or death	1=Yes	2=No
a2	Contacting with wild animals	1=Yes	2=No
a3	Presence of rats in home	1=Yes	2=No
a4	Presence of rats in the working areas	1=Yes	2=No
a5	Contacting with a dead rat	1=Yes	2=No
a6	Farming	1=Yes	2=No
a7	Hunting	1=Yes	2=No
a8	Picking tea or herbs	1=Yes	2=No
a9	Presence of weeds and shrubs in working areas	1=Yes	2=No
a10	Presence of weeds and shrubs around the house	1=Yes	2=No
a11	Presence of ticks in working areas or around the house	1=Yes	2=No
a12	Removing ticks from domestic animals	1=Yes	2=No
a13	Tick bites	1=Yes	2=No
a14	Other insects bites	1=Yes	2=No
a15	Taking preventative measures during outdoor activities	1=Yes	2=No
a16	Working with broken skins	1=Yes	2=No
a17	Resting on a grass field	1=Yes	2=No
a18	Having underlying diseases	1=Yes	2=No
